# Supplementary material
Source: PubMed Central journal article supplement (PMC31150)
Supplement: pnas_071053098_1.pdf [file pnas_071053098_1.pdf]

## Appendix

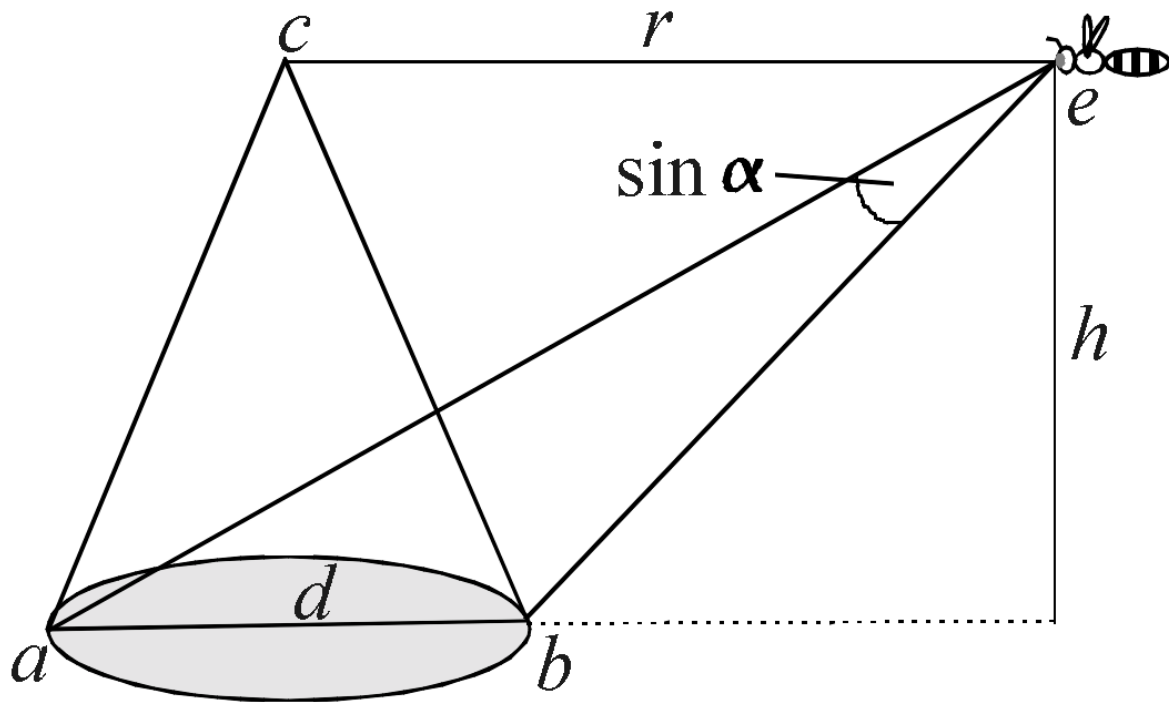

**Fig. 6.** This sketch illustrates the geometry necessary to calculate the radius of the detection area  $r$ , within which a bee flying at a given height  $h$  will be able to detect a flower with diameter  $d$ , given a resolution of  $\alpha \geq 5^\circ$  ( $\alpha \geq 15^\circ$  for the color recognition area).

In the first step, we calculate the triangle  $\Delta abe$  by

$$\frac{dh}{2} = \frac{1}{2} [\overline{ae}] [\overline{be}] \sin \alpha, \quad [\text{A1}]$$

where

$$[\overline{ae}] = \sqrt{h^2 + \left(r + \frac{d}{2}\right)^2} \quad [\text{A2}]$$

and

$$[\overline{be}] = \sqrt{h^2 + \left(r - \frac{d}{2}\right)^2}. \quad [\text{A3}]$$

Now we insert Eqs. A2 and A3 in A1:

$$\frac{dh}{2} = \frac{1}{2} \sqrt{h^2 + \left(r + \frac{d}{2}\right)^2} \sqrt{h^2 + \left(r - \frac{d}{2}\right)^2} \sin \alpha. \quad [\text{A4}]$$

We square both sides,

$$\left(\frac{dh}{\sin \alpha}\right)^2 = \left[h^2 + \left(r + \frac{d}{2}\right)^2\right] \left[h^2 + \left(r - \frac{d}{2}\right)^2\right] = h^4 + 2h^2 \left(r^2 + \frac{d^2}{4}\right) + r^4 - r^2 \frac{d^2}{2} + \frac{d^4}{16}, \quad [\text{A5}]$$

and replace  $r^2$  by  $y$ ,

$$\left(\frac{dh}{\sin \alpha}\right)^2 = h^4 + 2h^2 \left(y + \frac{d^2}{4}\right) + y^2 - y \frac{d^2}{2} + \frac{d^4}{16}. \quad [\text{A6}]$$

In the next step, we solve the quadratic equation for  $y$ :

$$y_{1/2} = -\frac{2h^2 - \frac{d^2}{2}}{2} \pm \sqrt{\frac{\left(2h^2 - \frac{d^2}{2}\right)^2}{4} - \left(h^4 + h^2 \frac{d^2}{2} + \frac{d^4}{16} - \left(\frac{dh}{\sin \alpha}\right)^2\right)}. \quad [\text{A7}]$$

Finally, we calculate  $r$  by

$$r = \sqrt{|y|}. \quad [\text{A8}]$$
